# Supplementary material
Source: MDPI journal article supplement (https://www.mdpi.com/2073-4433/14/4/665)
Supplement: s1 [file s1]

# Soil Water Content at Planting Affects Determining Agricultural Drought for Rainfed Spring Wheat

Kai Zhang <sup>1,2</sup>, Funian Zhao <sup>2,\*</sup> and Bo Zhang <sup>1,\*</sup>

<sup>1</sup> College of Geography and Environmental Science, Northwest Normal University, Lanzhou 730070, China; zhangk@iamcma.cn

<sup>2</sup> Key Laboratory of Arid Climatic Change and Disaster Reduction of Gansu Province, Key Laboratory of Arid Climate Change and Disaster Reduction of CMA, Lanzhou Institute of Arid Meteorology, China Meteorological Administration, Lanzhou 730020, China

\* Correspondence: zhaofn@iamcma.cn (F.Z.); zhangbo@nwnu.edu.cn (B.Z.); Tel.: +86-931-2402780 (F.Z.)

**Table S1.** The regression equations between spring wheat yield and precipitation during spring wheat growing season. Equation 1, 2 and 3 was the relationship between spring wheat yield and precipitation during spring wheat growing season without and with classification by soil water content at planting. Soil conditions was classified into two groups by amount of soil water content at planting greater or less than 100 mm. The uppercase letters after the numbers indicates a significant difference at 0.01 level, and the lowercase letters indicates a significant difference at 0.05 level.

| Equation number | Soil conditions | Slope    | Intercept | R <sup>2</sup> | P      |
|-----------------|-----------------|----------|-----------|----------------|--------|
| 1               | /               | 11.22 B  | 13.06 B   | 0.275          | <0.05  |
| 2               | Wet             | 13.66 Ab | -41.90 C  | 0.624          | <0.05  |
| 3               | Dry             | 14.92 Aa | 45.82 A   | 0.612          | <0.001 |

**Table S2.** Mean values of spring wheat yield, soil water content at planting, and precipitation during spring wheat growing season of five different climatic patterns. H, M and L indicates high, middle and low levels, respectively. The uppercase letters after the numbers indicate a significant difference at 0.01 level, and the lowercase letters indicate a significant difference at 0.05 level.

| Patterns  | Soil water content (mm) | Precipitation (mm) | Yield (Kg ha <sup>-1</sup> ) | Class   |
|-----------|-------------------------|--------------------|------------------------------|---------|
| A (HHH)   | 127.42 Aa               | 175.85 A           | 3161.433 A                   | Normal  |
| B (MH-MH) | 90.275 B                | 178.925 A          | 2169.146 B                   | Normal  |
| C (HLM)   | 113.396 Ab              | 86.26 C            | 1756.75 C                    | Normal  |
| D (LM-ML) | 80.084 C                | 123.671 B          | 1152.824 D                   | Drought |
| E (LLL)   | 81.305 C                | 57.8 D             | 342.5 E                      | Drought |
